# Supplementary material
Source: ML conference proceedings conference paper supplement (https://openreview.net/forum?id=KPflk96Smu)

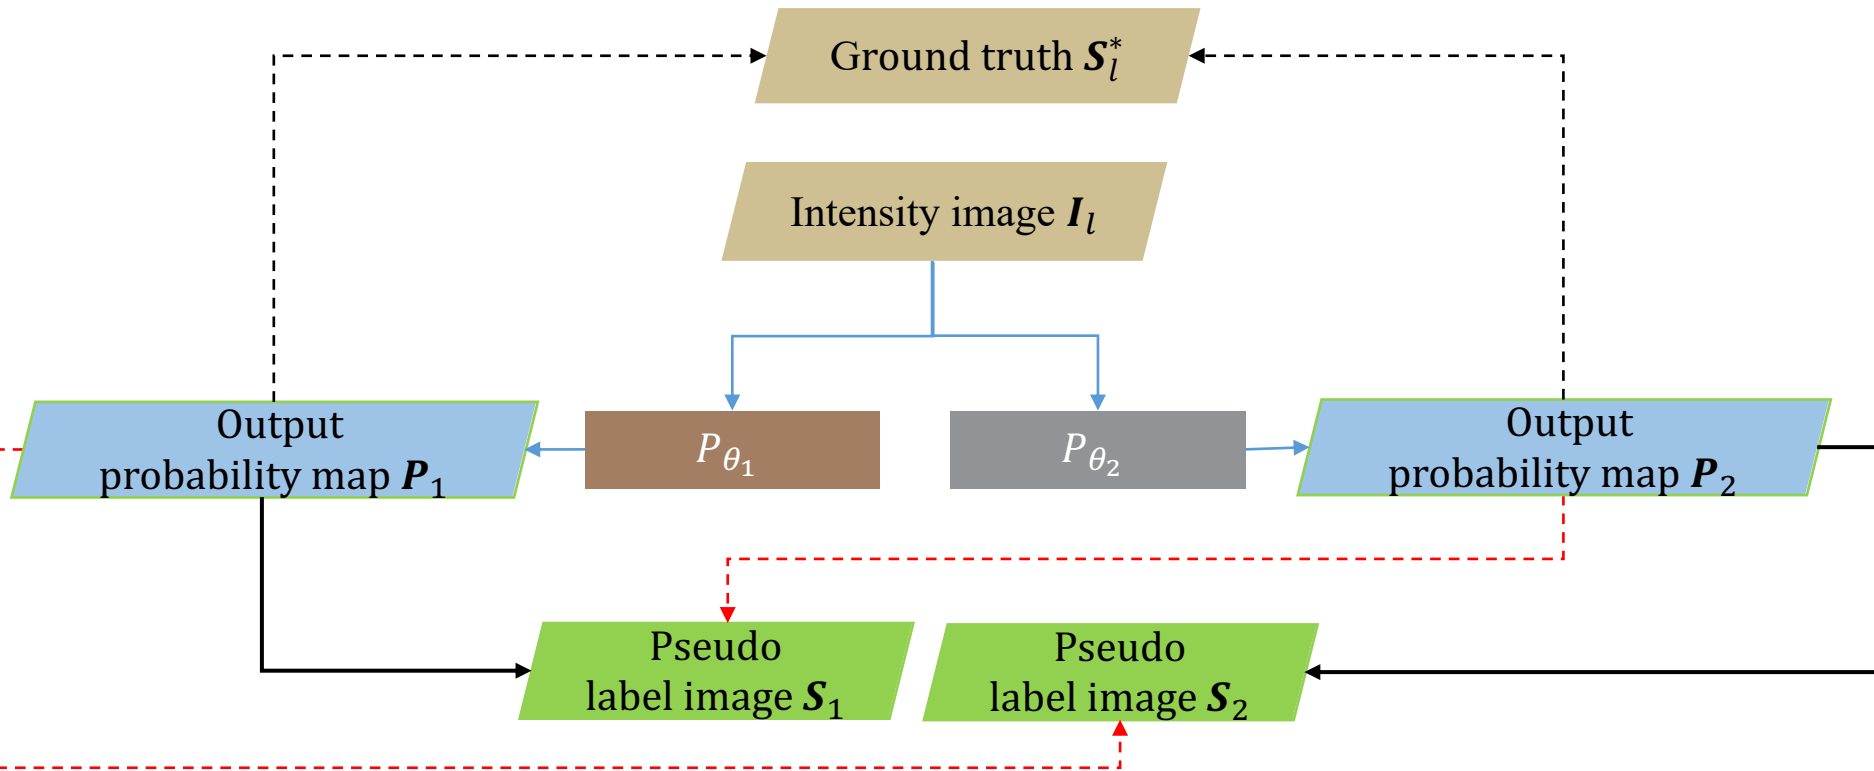

Supplement: supplementary_material [file attachment]

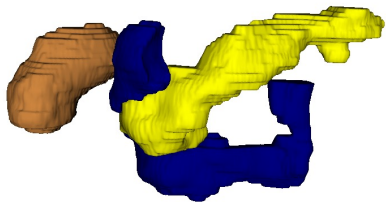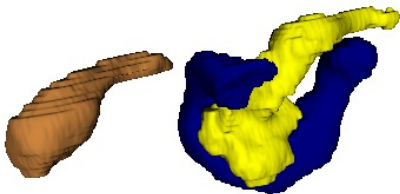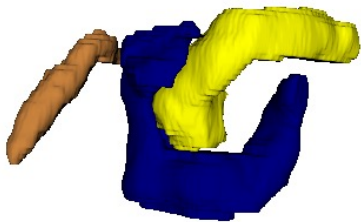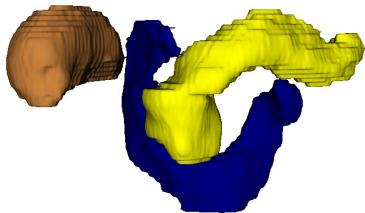

Supplement: supplementary_material [file attachment]

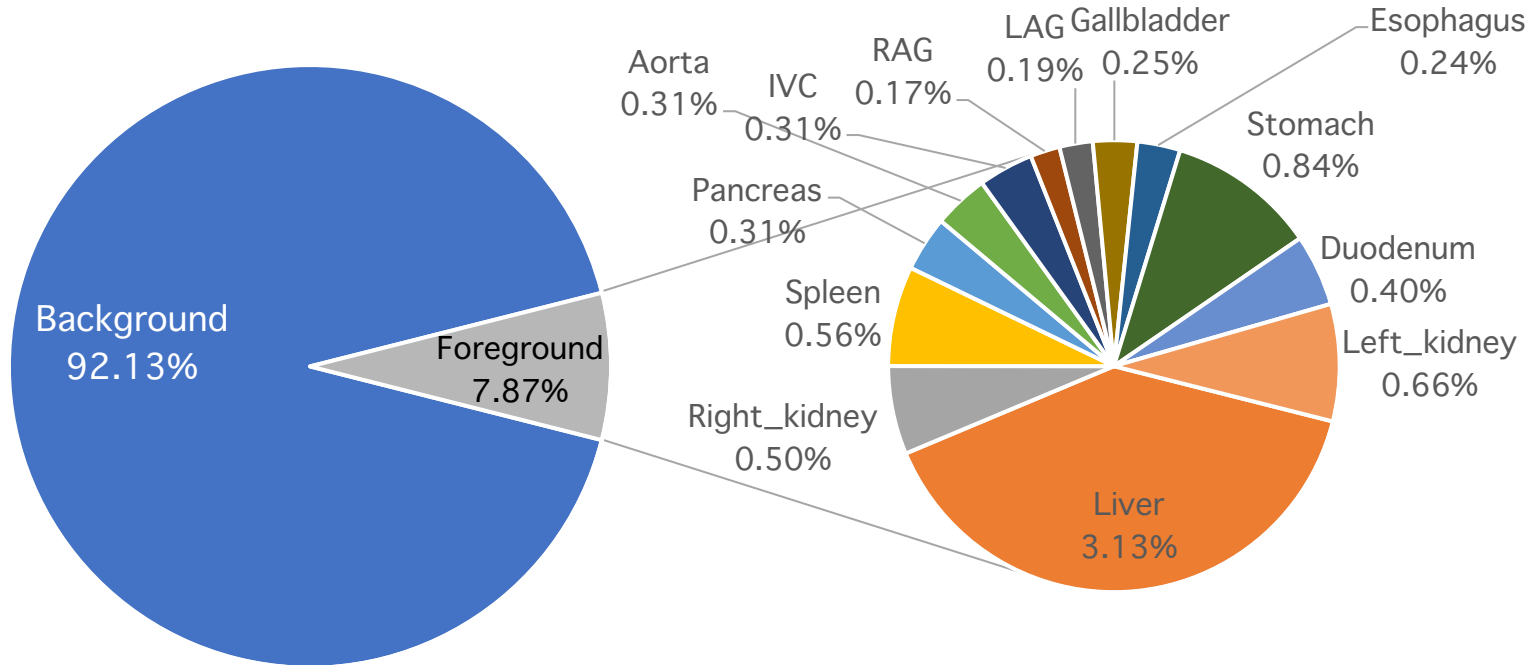

Supplement: supplementary_material [file attachment]

Intensity image

SemiSeg-CSSN

Ground truth

Case #0006

91.3

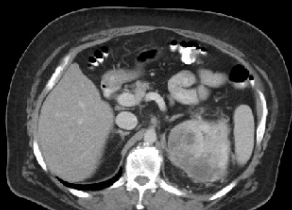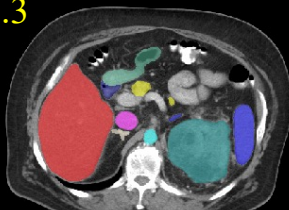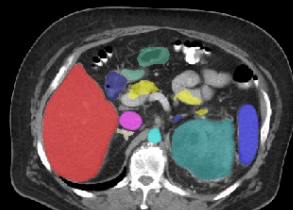

Case #0035

87.2

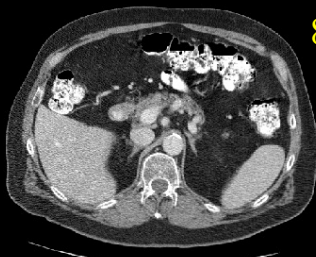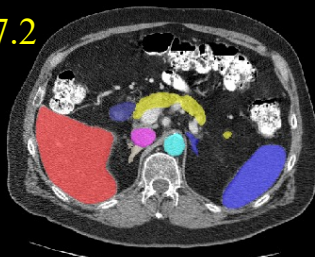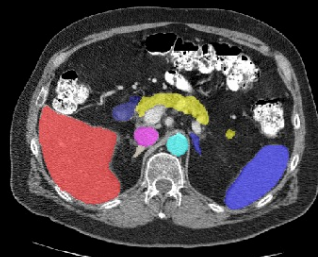

Case #0047

64.1

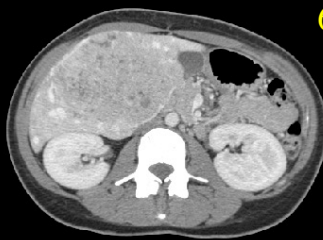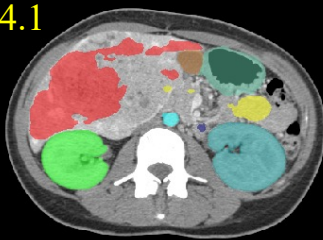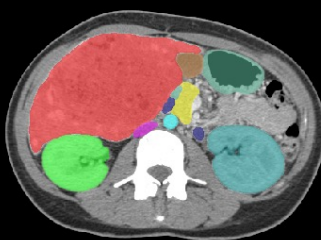

Case #0048

59.4

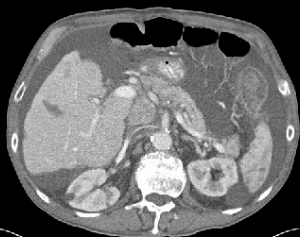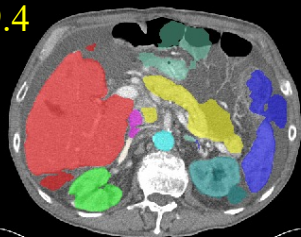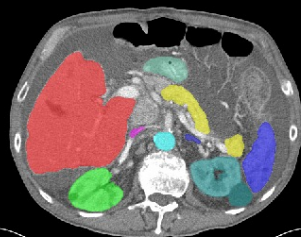

Supplement: supplementary_material [file attachment]

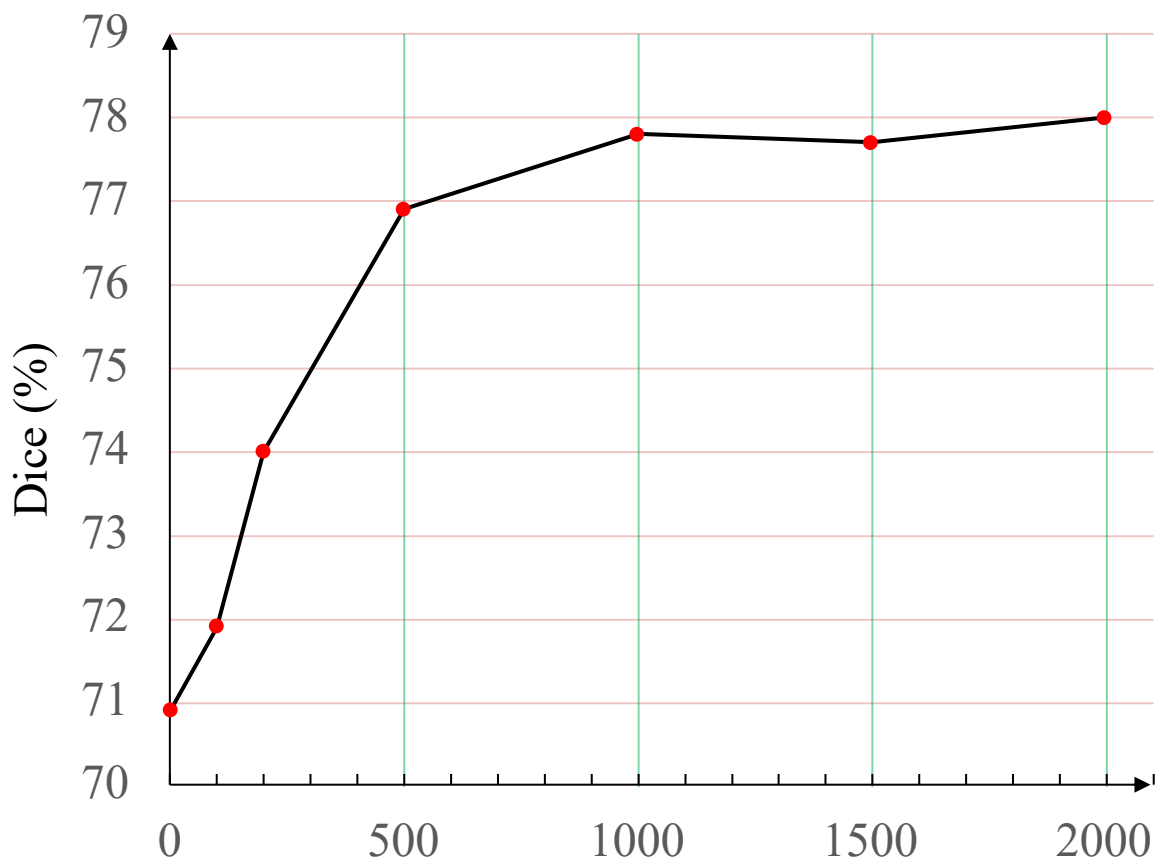

Supplement: supplementary_material [file attachment]

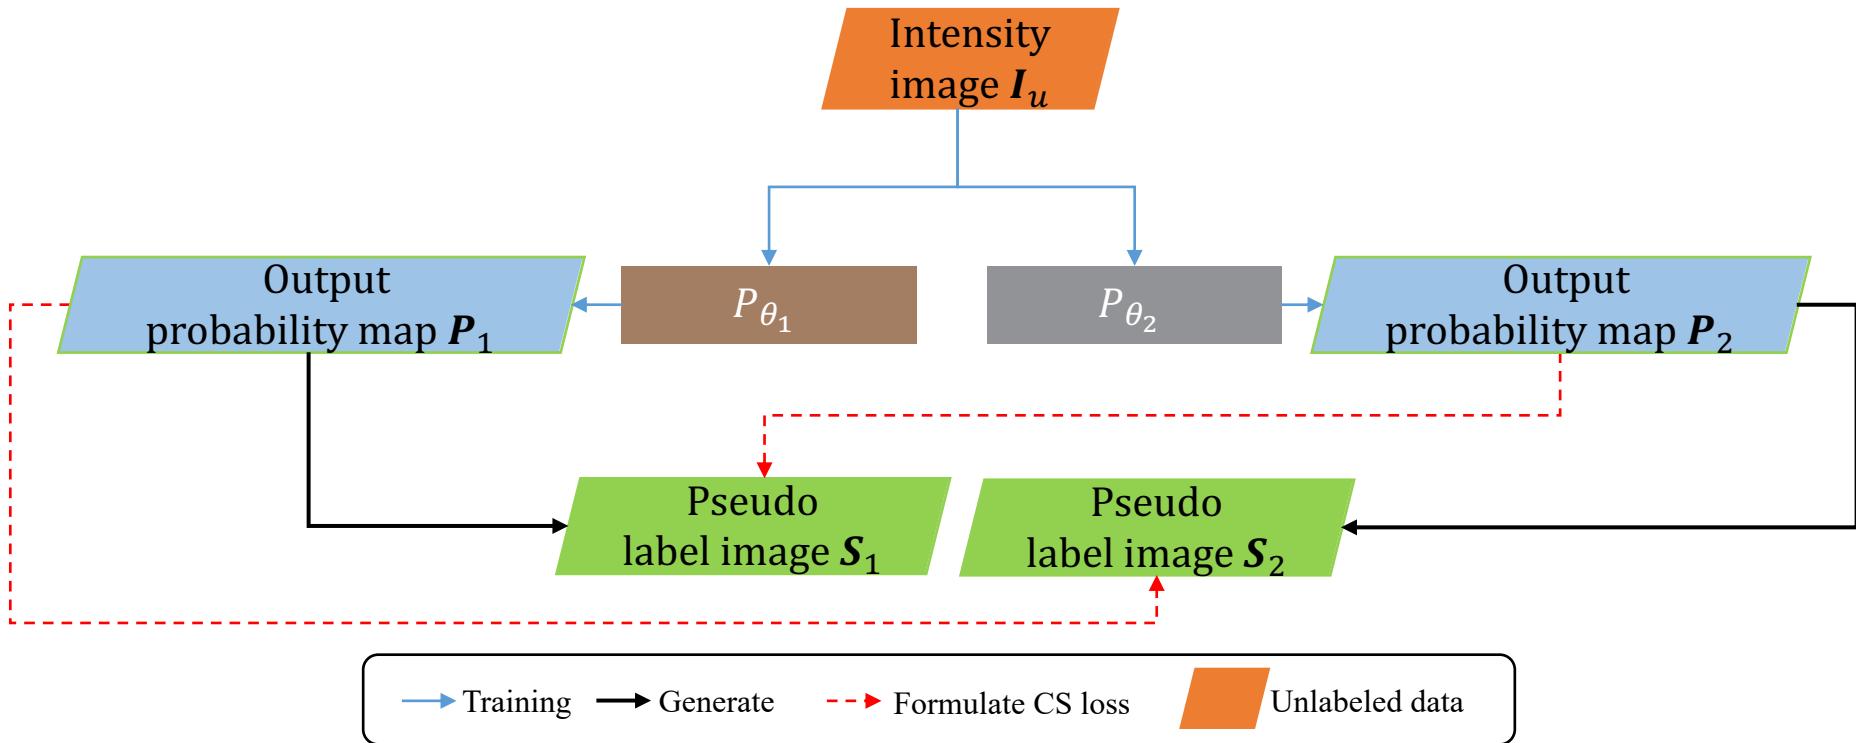

Supplement: supplementary_material [file attachment]

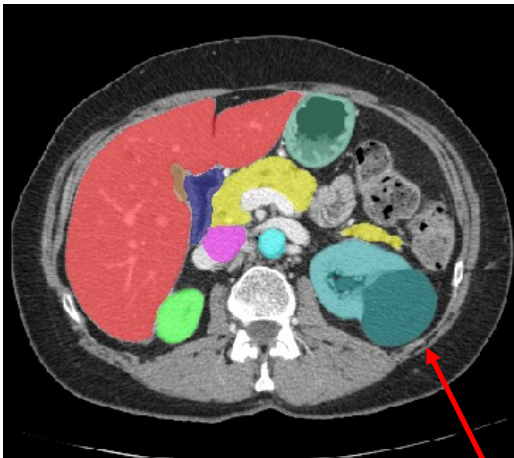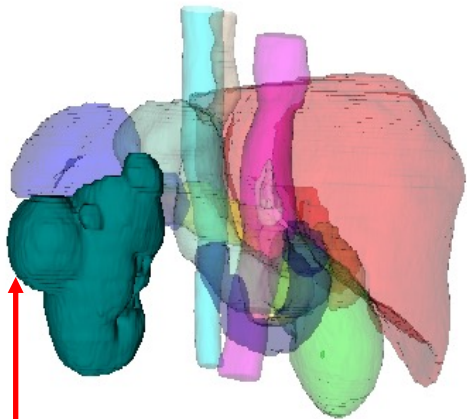

Tumor

Supplement: supplementary_material [file attachment]
